# Supplementary material for: Longitudinal Serum Protein Analysis of Women with a High Risk of Developing Breast Cancer Reveals Large Interpatient Versus Small Intrapatient Variations: First Results from the TESTBREAST Study
Source: MDPI journal article supplement (doi:10.3390/ijms232012399), 2022-10-17
Supplement: s1 [file s1]

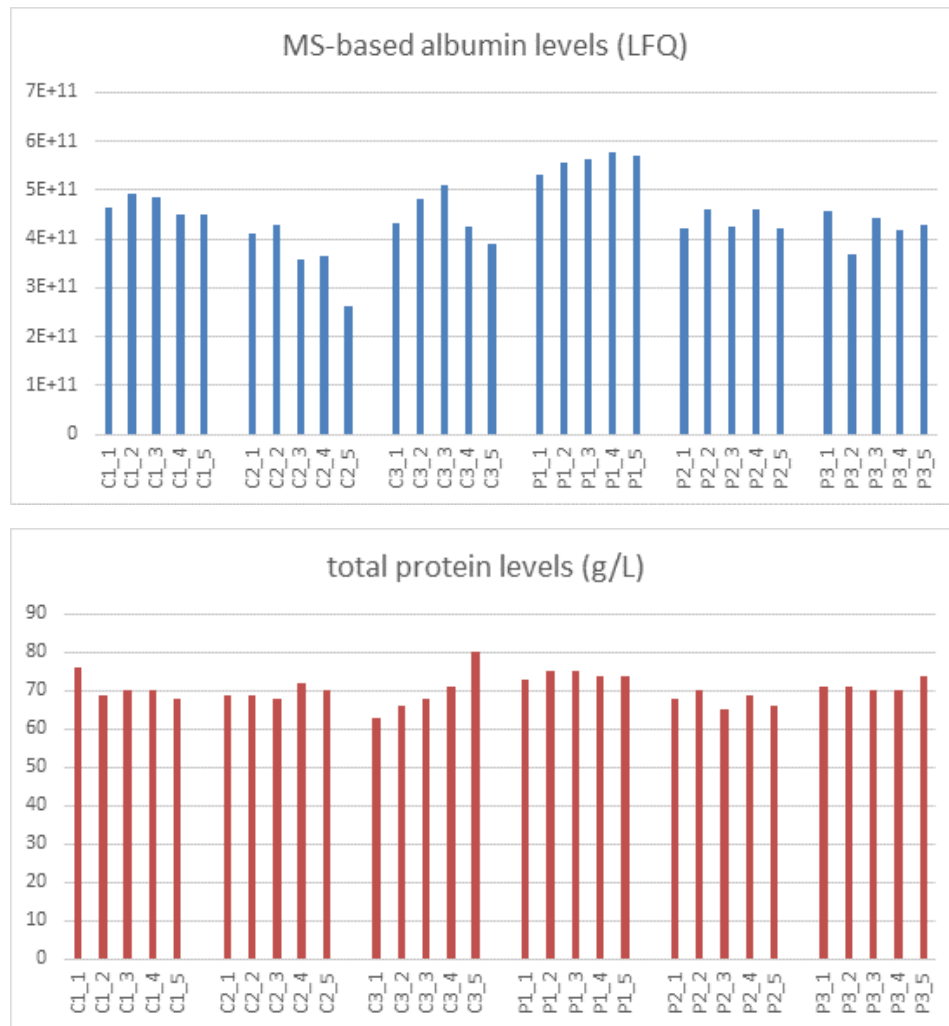

**Figure S1.** Serum albumin levels measured by mass spectrometer and the total protein levels as quantified by a clinical assay using a Cobas c502 analyzer (Roche Diagnostics, Mannheim, DE), functioning as a quality control of the samples. Five sequential serum timepoints of the three controls are shown on the left, cases on the right side.

**Table S1.** Sample control - Timepoint 5 (T5) is the serum sample closest to diagnosis.

| <b>Case</b> | <b>Total proteins<br/>(range 66-87 g/L)</b> | <b>Control</b> | <b>Total proteins<br/>(range 66-87 g/L)</b> |
|-------------|---------------------------------------------|----------------|---------------------------------------------|
| Case 1 T1   | 76                                          | Control 1 T1   | 73                                          |
| Case 1 T2   | 69                                          | Control 1 T2   | 75                                          |
| Case 1 T3   | 70                                          | Control 1 T3   | 75                                          |
| Case 1 T4   | 70                                          | Control 1 T4   | 74                                          |
| Case 1 T5   | 68                                          | Control 1 T5   | 74                                          |
| Case 2 T1   | 69                                          | Control 2 T1   | 68                                          |
| Case 2 T2   | 69                                          | Control 2 T2   | 70                                          |
| Case 2 T3   | 68                                          | Control 2 T3   | 65                                          |
| Case 2 T4   | 72                                          | Control 2 T4   | 69                                          |
| Case 2 T5   | 70                                          | Control 2 T5   | 66                                          |
| Case 3 T1   | 63                                          | Control 3 T1   | 71                                          |
| Case 3 T2   | 66                                          | Control 3 T2   | 71                                          |
| Case 3 T3   | 68                                          | Control 3 T3   | 70                                          |
| Case 3 T4   | 71                                          | Control 3 T4   | 70                                          |
| Case 3 T5   | 80                                          | Control 3 T5   | 74                                          |

Table S2. Overview of the 267 proteins that passed the criterium of LFQ intensity data, together with the majority protein IDs, protein names, gene names, IDs and F-values.

| Majority protein ID   | Protein name                                                                                                                                                                                                                                               | Gene name | ID  | F-value     |
|-----------------------|------------------------------------------------------------------------------------------------------------------------------------------------------------------------------------------------------------------------------------------------------------|-----------|-----|-------------|
| P08519                | Apolipoprotein(a)                                                                                                                                                                                                                                          | LPA       | 330 | 204,9901818 |
| P01859                | Ig gamma-2 chain C region                                                                                                                                                                                                                                  | IGHG2     | 200 | 140,4398941 |
| P0DOX3                | Immunoglobulin delta heavy chain                                                                                                                                                                                                                           |           | 353 | 124,7547037 |
| P26927                | Hepatocyte growth factor-like protein;Hepatocyte growth factor-like protein alpha chain;Hepatocyte growth factor-like protein beta chain                                                                                                                   | MST1      | 467 | 97,51252789 |
| P27169                | Serum paraoxonase/arylesterase 1                                                                                                                                                                                                                           | PON1      | 470 | 91,62240576 |
| P01861                | Ig gamma-4 chain C region                                                                                                                                                                                                                                  | IGHG4     | 202 | 88,84864448 |
| P11226                | Mannose-binding protein C                                                                                                                                                                                                                                  | MBL2      | 380 | 76,71244479 |
| P01721                | Ig lambda chain V-VI region AR                                                                                                                                                                                                                             | IGLV6-57  | 184 | 71,14886699 |
| P80748                | Ig lambda chain V-III region LOI                                                                                                                                                                                                                           | IGLV3-21  | 566 | 63,45989495 |
| P02776                | Platelet factor 4;Platelet factor 4, short form                                                                                                                                                                                                            | PF4       | 236 | 50,93543021 |
| P01876                | Ig alpha-1 chain C region                                                                                                                                                                                                                                  | IGHA1     | 204 | 48,79517836 |
| Q6YHK3                | CD109 antigen                                                                                                                                                                                                                                              | CD109     | 645 | 45,42294819 |
| Q15485                | Ficolin-2                                                                                                                                                                                                                                                  | FCN2      | 622 | 44,91808301 |
| P0DP09;<br>A0A0B4J2D9 | Immunoglobulin kappa variable 1-13                                                                                                                                                                                                                         | IGKV1D-13 | 36  | 42,31795583 |
| A0A075B6R2            | Immunoglobulin heavy variable 4-4                                                                                                                                                                                                                          | IGHV4-4   | 11  | 41,3933345  |
| A0A0B4J1U3            | Immunoglobulin lambda variable 1-36                                                                                                                                                                                                                        | IGLV1-36  | 25  | 41,33594238 |
| P13671                | Complement component C6                                                                                                                                                                                                                                    | C6        | 399 | 41,1401531  |
| P00739                | Haptoglobin-related protein                                                                                                                                                                                                                                | HPR       | 147 | 40,49682158 |
| P01860                | Ig gamma-3 chain C region                                                                                                                                                                                                                                  | IGHG3     | 201 | 39,32285784 |
| P36955                | Pigment epithelium-derived factor                                                                                                                                                                                                                          | SERPINF1  | 499 | 38,91938274 |
| Q92496                | Complement factor H-related protein 4                                                                                                                                                                                                                      | CFHR4     | 685 | 37,59918944 |
| P17936                | Insulin-like growth factor-binding protein 3                                                                                                                                                                                                               | IGFBP3    | 426 | 36,32463066 |
| P02763                | Alpha-1-acid glycoprotein 1                                                                                                                                                                                                                                | ORM1      | 231 | 35,95604107 |
| Q6UXB8                | Peptidase inhibitor 16                                                                                                                                                                                                                                     | PI16      | 642 | 35,46243414 |
| P0DOX2                | Immunoglobulin alpha-2 heavy chain                                                                                                                                                                                                                         |           | 352 | 34,41140409 |
| Q6EMK4                | Vasorin                                                                                                                                                                                                                                                    | VASN      | 636 | 34,01435553 |
| P43251                | Biotinidase                                                                                                                                                                                                                                                | BTD       | 509 | 33,94966967 |
| O43866                | CD5 antigen-like                                                                                                                                                                                                                                           | CD5L      | 113 | 33,82152976 |
| Q14520                | Hyaluronan-binding protein 2;Hyaluronan-binding protein 2 50 kDa heavy chain;Hyaluronan-binding protein 2 50 kDa heavy chain alternate form;Hyaluronan-binding protein 2 27 kDa light chain;Hyaluronan-binding protein 2 27 kDa light chain alternate form | HABP2     | 610 | 32,84851401 |

|                       |                                                                                                                                                                                                        |           |     |             |
|-----------------------|--------------------------------------------------------------------------------------------------------------------------------------------------------------------------------------------------------|-----------|-----|-------------|
| P00738                | Haptoglobin;Haptoglobin alpha chain;Haptoglobin beta chain                                                                                                                                             | HP        | 146 | 32,1597555  |
| P01833                | Polymeric immunoglobulin receptor;Secretory component                                                                                                                                                  | PIGR      | 198 | 31,41471026 |
| O14786                | Neuropilin-1                                                                                                                                                                                           | NRP1      | 105 | 31,40138875 |
| P05546                | Heparin cofactor 2                                                                                                                                                                                     | SERPIND1  | 283 | 31,18474822 |
| P02786                | Transferrin receptor protein 1;Transferrin receptor protein 1, serum form                                                                                                                              | TFRC      | 237 | 31,13622767 |
| Q7Z7G0                | Target of Nesh-SH3                                                                                                                                                                                     | ABI3BP    | 648 | 30,60667276 |
| P01871                | Ig mu chain C region                                                                                                                                                                                   | IGHM      | 203 | 30,11881174 |
| P15169                | Carboxypeptidase N catalytic chain                                                                                                                                                                     | CPN1      | 411 | 29,04463113 |
| P29622                | Kallistatin                                                                                                                                                                                            | SERPINA4  | 477 | 28,26987802 |
| P02788                | Lactotransferrin;Lactoferricin-H;Kaliocin-1;Lactoferroxin-A;Lactoferroxin-B;Lactoferroxin-C                                                                                                            | LTF       | 239 | 27,31388602 |
| P04433;<br>A0A0A0MRZ8 | Ig kappa chain V-III region VG                                                                                                                                                                         | IGKV3D-11 | 261 | 26,38595374 |
| A0A075B6H9            | Immunoglobulin lambda variable 4-69                                                                                                                                                                    | IGLV4-69  | 0   | 26,18565375 |
| P00748                | Coagulation factor XII;Coagulation factor XIIa heavy chain;Beta-factor XIIa part 1;Coagulation factor XIIa light chain                                                                                 | F12       | 152 | 26,03164758 |
| A0A0B4J1V0            | Immunoglobulin heavy variable 3-15                                                                                                                                                                     | IGHV3-15  | 27  | 25,92596001 |
| P02649                | Apolipoprotein E                                                                                                                                                                                       | APOE      | 211 | 25,88199745 |
| P04278                | Sex hormone-binding globulin                                                                                                                                                                           | SHBG      | 258 | 25,54219418 |
| A2NJV5                | Immunoglobulin kappa variable 2-29                                                                                                                                                                     | IGKV A18  | 62  | 24,48567541 |
| P06276                | Cholinesterase                                                                                                                                                                                         | BCHE      | 285 | 24,43548937 |
| Q76LX8                | A disintegrin and metalloproteinase with thrombospondin motifs 13                                                                                                                                      | ADAMTS13  | 646 | 23,87113983 |
| P07357                | Complement component C8 alpha chain                                                                                                                                                                    | C8A       | 305 | 23,76148776 |
| P14625                | Endoplasmin                                                                                                                                                                                            | HSP90B1   | 406 | 22,89309747 |
| Q9Y5Y7                | Lymphatic vessel endothelial hyaluronic acid receptor 1                                                                                                                                                | LYVE1     | 759 | 22,87658836 |
| Q08380                | Galectin-3-binding protein                                                                                                                                                                             | LGALS3BP  | 584 | 22,73382986 |
| P07358                | Complement component C8 beta chain                                                                                                                                                                     | C8B       | 306 | 22,19881404 |
| P08697                | Alpha-2-antiplasmin                                                                                                                                                                                    | SERPINF2  | 336 | 22,1167544  |
| P01023                | Alpha-2-macroglobulin                                                                                                                                                                                  | A2M       | 160 | 21,92780343 |
| P0DJI8                | Serum amyloid A-1 protein;Amyloid protein A;Serum amyloid protein A(2-104);Serum amyloid protein A(3-104);Serum amyloid protein A(2-103);Serum amyloid protein A(2-102);Serum amyloid protein A(4-101) | SAA1      | 348 | 21,01332697 |
| P0DOX5; P01857        | Ig gamma-1 chain C region                                                                                                                                                                              | IGHG1     | 355 | 21,00149317 |
| Q96IY4                | Carboxypeptidase B2                                                                                                                                                                                    | CPB2      | 693 | 20,82373336 |
| P05156                | Complement factor I;Complement factor I heavy chain;Complement factor I light chain                                                                                                                    | CFI       | 275 | 20,57320276 |

|        |                                                                                                                                                      |          |     |             |
|--------|------------------------------------------------------------------------------------------------------------------------------------------------------|----------|-----|-------------|
| Q04756 | Hepatocyte growth factor activator;Hepatocyte growth factor activator short chain;Hepatocyte growth factor activator long chain                      | HGFAC    | 579 | 20,40510236 |
| O75882 | Attractin                                                                                                                                            | ATRN     | 127 | 20,3903698  |
| P01703 | Ig lambda chain V-I region NEWM                                                                                                                      | IGLV1-40 | 179 | 20,1963928  |
| P02655 | Apolipoprotein C-II;Proapolipoprotein C-II                                                                                                           | APOC2    | 214 | 20,15880602 |
| P02787 | Serotransferrin                                                                                                                                      | TF       | 238 | 20,0483842  |
| Q9BXR6 | Complement factor H-related protein 5                                                                                                                | CFHR5    | 707 | 19,67076742 |
| P01619 | Ig kappa chain V-III region B6                                                                                                                       | IGKV3-20 | 174 | 19,63534486 |
| P00746 | Complement factor D                                                                                                                                  | CFD      | 150 | 19,52807981 |
| P33151 | Cadherin-5                                                                                                                                           | CDH5     | 488 | 19,06578892 |
| P19652 | Alpha-1-acid glycoprotein 2                                                                                                                          | ORM2     | 435 | 18,95625521 |
| P04275 | von Willebrand factor;von Willebrand antigen 2                                                                                                       | VWF      | 257 | 18,3404499  |
| Q92954 | Proteoglycan 4;Proteoglycan 4 C-terminal part                                                                                                        | PRG4     | 690 | 18,09535217 |
| Q03591 | Complement factor H-related protein 1                                                                                                                | CFHR1    | 577 | 17,68876171 |
| P01714 | Ig lambda chain V-III region SH                                                                                                                      | IGLV3-19 | 181 | 17,42203857 |
| Q9UGM5 | Fetuin-B                                                                                                                                             | FETUB    | 739 | 17,35599574 |
| P01042 | Kininogen-1;Kininogen-1 heavy chain;T-kinin;Bradykinin;Lysyl-bradykinin;Kininogen-1 light chain;Low molecular weight growth-promoting factor         | KNG1     | 165 | 17,28548424 |
| P11021 | 78 kDa glucose-regulated protein                                                                                                                     | HSPA5    | 375 | 17,12774992 |
| Q92820 | Gamma-glutamyl hydrolase                                                                                                                             | GGH      | 687 | 16,91123585 |
| Q12913 | Receptor-type tyrosine-protein phosphatase eta                                                                                                       | PTPRJ    | 592 | 16,52302718 |
| O14791 | Apolipoprotein L1                                                                                                                                    | APOL1    | 106 | 16,48824193 |
| P10643 | Complement component C7                                                                                                                              | C7       | 368 | 15,94615629 |
| P08571 | Monocyte differentiation antigen CD14;Monocyte differentiation antigen CD14, urinary form;Monocyte differentiation antigen CD14, membrane-bound form | CD14     | 332 | 15,93222346 |
| P04196 | Histidine-rich glycoprotein                                                                                                                          | HRG      | 253 | 15,62937288 |
| Q9UHG3 | Prenylcysteine oxidase 1                                                                                                                             | PCYOX1   | 740 | 15,39158446 |
| Q06033 | Inter-alpha-trypsin inhibitor heavy chain H3                                                                                                         | ITIH3    | 580 | 15,33582345 |
| P22891 | Vitamin K-dependent protein Z                                                                                                                        | PROZ     | 450 | 15,31074079 |
| P07225 | Vitamin K-dependent protein S                                                                                                                        | PROS1    | 298 | 15,23747764 |
| P00747 | Plasminogen;Plasmin heavy chain A;Activation peptide;Angiostatin;Plasmin heavy chain A, short form;Plasmin light chain B                             | PLG      | 151 | 14,88465516 |
| P00734 | Prothrombin;Activation peptide fragment 1;Activation peptide fragment 2;Thrombin light chain;Thrombin heavy chain                                    | F2       | 144 | 14,87214195 |

|                |                                                                                                                                                                                                                                                                    |           |     |             |
|----------------|--------------------------------------------------------------------------------------------------------------------------------------------------------------------------------------------------------------------------------------------------------------------|-----------|-----|-------------|
| P00736         | Complement C1r subcomponent;Complement C1r subcomponent heavy chain;Complement C1r subcomponent light chain                                                                                                                                                        | C1R       | 145 | 14,68690751 |
| P35443         | Thrombospondin-4                                                                                                                                                                                                                                                   | THBS4     | 491 | 14,67267973 |
| P23142         | Fibulin-1                                                                                                                                                                                                                                                          | FBLN1     | 453 | 14,64295405 |
| P08185         | Corticosteroid-binding globulin                                                                                                                                                                                                                                    | SERPINA6  | 320 | 14,61448394 |
| Q07954         | Prolow-density lipoprotein receptor-related protein 1;Low-density lipoprotein receptor-related protein 1 85 kDa subunit;Low-density lipoprotein receptor-related protein 1 515 kDa subunit;Low-density lipoprotein receptor-related protein 1 intracellular domain | LRP1      | 583 | 14,50390371 |
| P0C0L5         | Complement C4-B;Complement C4 beta chain;Complement C4-B alpha chain;C4a anaphylatoxin;C4b-B;C4d-B;Complement C4 gamma chain                                                                                                                                       | C4B       | 347 | 14,46212259 |
| Q9Y6R7         | IgGfC-binding protein                                                                                                                                                                                                                                              | FCGBP     | 761 | 14,43720695 |
| P12259         | Coagulation factor V;Coagulation factor V heavy chain;Coagulation factor V light chain                                                                                                                                                                             | F5        | 390 | 14,17584805 |
| P08709         | Coagulation factor VII;Factor VII light chain;Factor VII heavy chain                                                                                                                                                                                               | F7        | 337 | 14,078676   |
| P01824         | Ig heavy chain V-II region WAH                                                                                                                                                                                                                                     | IGHV4-39  | 197 | 13,98442496 |
| P01701         | Ig lambda chain V-I region NEW                                                                                                                                                                                                                                     | IGLV1-51  | 178 | 13,8405282  |
| Q15582         | Transforming growth factor-beta-induced protein ig-h3                                                                                                                                                                                                              | TGFBI     | 623 | 13,77803898 |
| P01594; P01593 | Ig kappa chain V-I region AU;Ig kappa chain V-I region AG                                                                                                                                                                                                          |           | 169 | 13,70475301 |
| P27918         | Properdin                                                                                                                                                                                                                                                          | CFP       | 473 | 13,67685267 |
| P11597         | Cholesteryl ester transfer protein                                                                                                                                                                                                                                 | CETP      | 385 | 13,56392574 |
| Q13093         | Platelet-activating factor acetylhydrolase                                                                                                                                                                                                                         | PLA2G7    | 593 | 13,51306496 |
| P06396         | Gelsolin                                                                                                                                                                                                                                                           | GSN       | 288 | 13,39775077 |
| P05452         | Tetranectin                                                                                                                                                                                                                                                        | CLEC3B    | 281 | 13,3191491  |
| P20742         | Pregnancy zone protein                                                                                                                                                                                                                                             | PZP       | 439 | 13,26009203 |
| P14780         | Matrix metalloproteinase-9;67 kDa matrix metalloproteinase-9;82 kDa matrix metalloproteinase-9                                                                                                                                                                     | MMP9      | 408 | 13,21782773 |
| P01591         | Immunoglobulin J chain                                                                                                                                                                                                                                             | IGJ       | 168 | 12,97744208 |
| A0A0B4J1V2     | Immunoglobulin heavy variable 2-26                                                                                                                                                                                                                                 | IGHV2-26  | 29  | 12,86973141 |
| P02765         | Alpha-2-HS-glycoprotein;Alpha-2-HS-glycoprotein chain A;Alpha-2-HS-glycoprotein chain B                                                                                                                                                                            | AHSG      | 232 | 12,77593877 |
| P02751         | Fibronectin;Anastellin;Ugl-Y1;Ugl-Y2;Ugl-Y3                                                                                                                                                                                                                        | FN1       | 228 | 12,55287988 |
| A0A075B6S6     | Immunoglobulin kappa variable 2D-30                                                                                                                                                                                                                                | IGKV2D-30 | 14  | 12,5467899  |
| Q15113         | Procollagen C-endopeptidase enhancer 1                                                                                                                                                                                                                             | PCOLCE    | 617 | 12,53978791 |
| P02760         | Protein AMBP;Alpha-1-microglobulin;Inter-alpha-trypsin inhibitor light chain;Trypstatin                                                                                                                                                                            | AMBP      | 230 | 12,32978372 |

|                          |                                                                                                                                                                                                                                                                                                                                   |           |     |             |
|--------------------------|-----------------------------------------------------------------------------------------------------------------------------------------------------------------------------------------------------------------------------------------------------------------------------------------------------------------------------------|-----------|-----|-------------|
| Q15063;<br>CON__Q2KJC7   | Periostin                                                                                                                                                                                                                                                                                                                         | POSTN     | 616 | 12,28381375 |
| P07195                   | L-lactate dehydrogenase B chain                                                                                                                                                                                                                                                                                                   | LDHB      | 297 | 12,26423427 |
| P02750                   | Leucine-rich alpha-2-glycoprotein                                                                                                                                                                                                                                                                                                 | LRG1      | 227 | 12,22915252 |
| P49747                   | Cartilage oligomeric matrix protein                                                                                                                                                                                                                                                                                               | COMP      | 516 | 12,14141617 |
| P12111                   | Collagen alpha-3(VI) chain                                                                                                                                                                                                                                                                                                        | COL6A3    | 389 | 11,97514762 |
| P05155                   | Plasma protease C1 inhibitor                                                                                                                                                                                                                                                                                                      | SERPING1  | 274 | 11,73910191 |
| A0A0C4DH36               | Probable non-functional immunoglobulin heavy variable 3-38                                                                                                                                                                                                                                                                        | IGHV3-38  | 47  | 11,6671925  |
| P15144                   | Aminopeptidase N                                                                                                                                                                                                                                                                                                                  | ANPEP     | 409 | 11,59839464 |
| A0A0B4J1X5               | Immunoglobulin heavy variable 3-74                                                                                                                                                                                                                                                                                                | IGHV3-74  | 32  | 11,59304579 |
| P54108                   | Cysteine-rich secretory protein 3                                                                                                                                                                                                                                                                                                 | CRISP3    | 523 | 11,50763282 |
| O00187                   | Mannan-binding lectin serine protease 2;Mannan-binding lectin serine protease 2 A chain;Mannan-binding lectin serine protease 2 B chain                                                                                                                                                                                           | MASP2     | 100 | 11,47117968 |
| P18065                   | Insulin-like growth factor-binding protein 2                                                                                                                                                                                                                                                                                      | IGFBP2    | 428 | 11,29127617 |
| P0DOX7                   | Immunoglobulin kappa light chain                                                                                                                                                                                                                                                                                                  |           | 357 | 11,16022737 |
| P51884                   | Lumican                                                                                                                                                                                                                                                                                                                           | LUM       | 521 | 11,1354501  |
| Q9NQ79                   | Cartilage acidic protein 1                                                                                                                                                                                                                                                                                                        | CRTAC1    | 727 | 11,07967191 |
| P03952                   | Plasma kallikrein;Plasma kallikrein heavy chain;Plasma kallikrein light chain                                                                                                                                                                                                                                                     | KLKB1     | 243 | 10,92920834 |
| Q15166                   | Serum paraoxonase/lactonase 3                                                                                                                                                                                                                                                                                                     | PON3      | 619 | 10,91688781 |
| P07360                   | Complement component C8 gamma chain                                                                                                                                                                                                                                                                                               | C8G       | 308 | 10,9019407  |
| P40197                   | Platelet glycoprotein V                                                                                                                                                                                                                                                                                                           | GP5       | 505 | 10,86766753 |
| P0DOY2                   | Immunoglobulin lambda constant 2                                                                                                                                                                                                                                                                                                  | IGLC2     | 359 | 10,85476035 |
| P01601                   | Ig kappa chain V-I region HK101                                                                                                                                                                                                                                                                                                   | IGKV1D-16 | 172 | 10,83377976 |
| P08603                   | Complement factor H                                                                                                                                                                                                                                                                                                               | CFH       | 333 | 10,76818983 |
| P01008                   | Antithrombin-III                                                                                                                                                                                                                                                                                                                  | SERPINC1  | 156 | 10,76049755 |
| P01009                   | Alpha-1-antitrypsin;Short peptide from AAT                                                                                                                                                                                                                                                                                        | SERPINA1  | 157 | 10,72521689 |
| P02775                   | Platelet basic protein;Connective tissue-activating peptide III;TC-2;Connective tissue-activating peptide III(1-81);Beta-thromboglobulin;Neutrophil-activating peptide 2(74);Neutrophil-activating peptide 2(73);Neutrophil-activating peptide 2;TC-1;Neutrophil-activating peptide 2(1-66);Neutrophil-activating peptide 2(1-63) | PPBP      | 235 | 10,71365159 |
| Q16706                   | Alpha-mannosidase 2                                                                                                                                                                                                                                                                                                               | MAN2A1    | 630 | 10,47827361 |
| A0A075B6K5               | Immunoglobulin lambda variable 3-9                                                                                                                                                                                                                                                                                                | IGLV3-9   | 8   | 10,42227854 |
| P02768;<br>CON__P02768-1 | Serum albumin                                                                                                                                                                                                                                                                                                                     | ALB       | 74  | 10,1273927  |
| P0DOX8                   | Immunoglobulin lambda-1 light chain                                                                                                                                                                                                                                                                                               |           | 358 | 10,03837644 |

|                           |                                                                                                                                                                                   |                        |     |             |
|---------------------------|-----------------------------------------------------------------------------------------------------------------------------------------------------------------------------------|------------------------|-----|-------------|
| P04430                    | Ig kappa chain V-I region BAN                                                                                                                                                     | IGKV1-16               | 260 | 10,00047652 |
| P01780                    | Ig heavy chain V-III region JON                                                                                                                                                   | IGHV3-7                | 193 | 9,851458873 |
| P01599                    | Ig kappa chain V-I region Gal                                                                                                                                                     | IGKV1-17               | 171 | 9,784995375 |
| A0A0C4DH68;<br>A0A075B6R9 | Immunoglobulin kappa variable 2-24                                                                                                                                                | IGKV2-24;<br>IGKV2D-24 | 12  | 9,748542539 |
| P43121                    | Cell surface glycoprotein MUC18                                                                                                                                                   | MCAM                   | 508 | 9,743876608 |
| P02743                    | Serum amyloid P-component;Serum amyloid P-component(1-203)                                                                                                                        | APCS                   | 221 | 9,680021388 |
| P05160                    | Coagulation factor XIII B chain                                                                                                                                                   | F13B                   | 276 | 9,652143361 |
| O00533                    | Neural cell adhesion molecule L1-like protein;Processed neural cell adhesion molecule L1-like protein                                                                             | CHL1                   | 102 | 9,467642542 |
| P22792                    | Carboxypeptidase N subunit 2                                                                                                                                                      | CPN2                   | 449 | 9,438943822 |
| P35858                    | Insulin-like growth factor-binding protein complex acid labile subunit                                                                                                            | IGFALS                 | 497 | 9,40003882  |
| P01031                    | Complement C5;Complement C5 beta chain;Complement C5 alpha chain;C5a anaphylatoxin;Complement C5 alpha chain                                                                      | C5                     | 162 | 9,290600181 |
| P00742                    | Coagulation factor X;Factor X light chain;Factor X heavy chain;Activated factor Xa heavy chain                                                                                    | F10                    | 149 | 9,249220079 |
| Q13201                    | Multimerin-1;Platelet glycoprotein Ia*;155 kDa platelet multimerin                                                                                                                | MMRN1                  | 595 | 9,111050315 |
| P02671                    | Fibrinogen alpha chain;Fibrinopeptide A;Fibrinogen alpha chain                                                                                                                    | FGA                    | 216 | 9,086666533 |
| P24821                    | Tenascin                                                                                                                                                                          | TNC                    | 462 | 9,029117284 |
| P09871                    | Complement C1s subcomponent;Complement C1s subcomponent heavy chain;Complement C1s subcomponent light chain                                                                       | C1S                    | 344 | 9,006521927 |
| P01011                    | Alpha-1-antichymotrypsin;Alpha-1-antichymotrypsin His-Pro-less                                                                                                                    | SERPINA3               | 158 | 8,938512701 |
| P06727                    | Apolipoprotein A-IV                                                                                                                                                               | APOA4                  | 291 | 8,853129768 |
| A0A075B6P5;<br>P01615     | Ig kappa chain V-II region FR                                                                                                                                                     | IGKV2D-28              | 9   | 8,834006015 |
| P0C0L4                    | Complement C4-A;Complement C4 beta chain;Complement C4-A alpha chain;C4a anaphylatoxin;C4b-A;C4d-A;Complement C4 gamma chain                                                      | C4A                    | 346 | 8,800630192 |
| O75636                    | Ficolin-3                                                                                                                                                                         | FCN3                   | 125 | 8,752889447 |
| P02753                    | Retinol-binding protein 4;Plasma retinol-binding protein(1-182);Plasma retinol-binding protein(1-181);Plasma retinol-binding protein(1-179);Plasma retinol-binding protein(1-176) | RBP4                   | 229 | 8,739944542 |
| P20851                    | C4b-binding protein beta chain                                                                                                                                                    | C4BPB                  | 441 | 8,733343271 |
| P01742                    | Ig heavy chain V-I region EU                                                                                                                                                      | IGHV1-69               | 185 | 8,518221012 |
| Q9Y4L1                    | Hypoxia up-regulated protein 1                                                                                                                                                    | HYOU1                  | 757 | 8,344583081 |
| A0A0B4J1Y9                | Immunoglobulin heavy variable 3-72                                                                                                                                                | IGHV3-72               | 35  | 8,030105539 |



|                       |                                                                                                                                                                                                                                                             |                |     |             |
|-----------------------|-------------------------------------------------------------------------------------------------------------------------------------------------------------------------------------------------------------------------------------------------------------|----------------|-----|-------------|
| P00751                | Complement factor B;Complement factor B Ba fragment;Complement factor B Bb fragment                                                                                                                                                                         | CFB            | 153 | 8,001646567 |
| P00450                | Ceruloplasmin                                                                                                                                                                                                                                               | CP             | 138 | 7,999513597 |
| P07996;<br>CON_Q28194 | Thrombospondin-1                                                                                                                                                                                                                                            | THBS1          | 317 | 7,753679164 |
| P07359                | Platelet glycoprotein Ib alpha chain;Glycocalicin                                                                                                                                                                                                           | GP1BA          | 307 | 7,751611325 |
| P60709; P63261        | Actin, cytoplasmic 1;Actin, cytoplasmic 1, N-terminally processed;Actin, cytoplasmic 2;Actin, cytoplasmic 2, N-terminally processed                                                                                                                         | ACTB;<br>ACTG1 | 540 | 7,652225374 |
| P54289                | Voltage-dependent calcium channel subunit alpha-2/delta-1;Voltage-dependent calcium channel subunit alpha-2-1;Voltage-dependent calcium channel subunit delta-1                                                                                             | CACNA2D<br>1   | 524 | 7,498042657 |
| Q8NBP7                | Proprotein convertase subtilisin/kexin type 9                                                                                                                                                                                                               | PCSK9          | 669 | 7,476159134 |
| P01700                | Ig lambda chain V-I region HA                                                                                                                                                                                                                               | IGLV1-47       | 177 | 7,378994672 |
| P02748                | Complement component C9;Complement component C9a;Complement component C9b                                                                                                                                                                                   | C9             | 225 | 7,378052347 |
| O95445                | Apolipoprotein M                                                                                                                                                                                                                                            | APOM           | 131 | 7,36046524  |
| A0A075B6K4            | Immunoglobulin lambda variable 3-10                                                                                                                                                                                                                         | IGLV3-10       | 7   | 7,352392319 |
| P05090                | Apolipoprotein D                                                                                                                                                                                                                                            | APOD           | 268 | 7,340181447 |
| Q6UX71                | Plexin domain-containing protein 2                                                                                                                                                                                                                          | PLXDC2         | 641 | 7,254507351 |
| P04003                | C4b-binding protein alpha chain                                                                                                                                                                                                                             | C4BPA          | 244 | 7,221840397 |
| P08195                | 4F2 cell-surface antigen heavy chain                                                                                                                                                                                                                        | SLC3A2         | 321 | 6,997363649 |
| Q9NZP8                | Complement C1r subcomponent-like protein                                                                                                                                                                                                                    | C1RL           | 731 | 6,984814624 |
| Q16610                | Extracellular matrix protein 1                                                                                                                                                                                                                              | ECM1           | 628 | 6,967108833 |
| P98160                | Basement membrane-specific heparan sulfate proteoglycan core protein;Endorepellin;LG3 peptide                                                                                                                                                               | HSPG2          | 567 | 6,940668369 |
| Q12860                | Contactin-1                                                                                                                                                                                                                                                 | CNTN1          | 588 | 6,892273198 |
| P48740                | Mannan-binding lectin serine protease 1;Mannan-binding lectin serine protease 1 heavy chain;Mannan-binding lectin serine protease 1 light chain                                                                                                             | MASP1          | 514 | 6,860012373 |
| P61769                | Beta-2-microglobulin;Beta-2-microglobulin form pI 5.3                                                                                                                                                                                                       | B2M            | 545 | 6,677691994 |
| P04070                | Vitamin K-dependent protein C;Vitamin K-dependent protein C light chain;Vitamin K-dependent protein C heavy chain;Activation peptide                                                                                                                        | PROC           | 248 | 6,568638828 |
| P10909                | Clusterin;Clusterin beta chain;Clusterin alpha chain                                                                                                                                                                                                        | CLU            | 374 | 6,518380748 |
| P03951                | Coagulation factor XI;Coagulation factor XIa heavy chain;Coagulation factor XIa light chain                                                                                                                                                                 | F11            | 242 | 6,495424064 |
| P01024                | Complement C3;Complement C3 beta chain;C3-beta-c;Complement C3 alpha chain;C3a anaphylatoxin;Acylation stimulating protein;Complement C3b alpha chain;Complement C3c alpha chain fragment 1;Complement C3dg fragment;Complement C3g fragment;Complement C3d | C3             | 161 | 6,458678065 |

|                           |                                                                                                                                                      |                     |     |             |
|---------------------------|------------------------------------------------------------------------------------------------------------------------------------------------------|---------------------|-----|-------------|
|                           | fragment;Complement C3f fragment;Complement C3c alpha chain fragment 2                                                                               |                     |     |             |
| P01602                    | Ig kappa chain V-I region HK102                                                                                                                      | IGKV1-5             | 173 | 6,349863645 |
| P02679                    | Fibrinogen gamma chain                                                                                                                               | FGG                 | 218 | 6,298520971 |
| P02774                    | Vitamin D-binding protein                                                                                                                            | GC                  | 234 | 6,292861724 |
| P02675                    | Fibrinogen beta chain;Fibrinopeptide B;Fibrinogen beta chain                                                                                         | FGB                 | 217 | 6,149522775 |
| P02749                    | Beta-2-glycoprotein 1                                                                                                                                | APOH                | 226 | 6,126900363 |
| P80108                    | Phosphatidylinositol-glycan-specific phospholipase D                                                                                                 | GPLD1               | 563 | 6,108926239 |
| A0A0B4J1U7                | Immunoglobulin heavy variable 6-1                                                                                                                    | IGHV6-1             | 26  | 6,106281015 |
| P05556                    | Integrin beta-1                                                                                                                                      | ITGB1               | 284 | 6,085348648 |
| P43652                    | Afamin                                                                                                                                               | AFM                 | 510 | 5,927231415 |
| Q96PD5                    | N-acetylmuramoyl-L-alanine amidase                                                                                                                   | PGLYRP2             | 696 | 5,922691846 |
| P03950                    | Angiogenin                                                                                                                                           | ANG                 | 241 | 5,883617596 |
| P02747                    | Complement C1q subcomponent subunit C                                                                                                                | C1QC                | 224 | 5,756444726 |
| O00391                    | Sulfhydryl oxidase 1                                                                                                                                 | QSOX1               | 101 | 5,725906214 |
| Q9H4A9                    | Dipeptidase 2                                                                                                                                        | DPEP2               | 713 | 5,69427735  |
| A0A0C4DH67;<br>A0A0C4DH69 | Immunoglobulin kappa variable 1-8                                                                                                                    | IGKV1-8;<br>IGKV1-9 | 52  | 5,665059377 |
| Q96KN2                    | Beta-Ala-His dipeptidase                                                                                                                             | CNDP1               | 694 | 5,635980289 |
| P25311                    | Zinc-alpha-2-glycoprotein                                                                                                                            | AZGP1               | 463 | 5,560267468 |
| A0A0A0MS15                | Immunoglobulin heavy variable 3-49                                                                                                                   | IGHV3-49            | 23  | 5,537640312 |
| P02746                    | Complement C1q subcomponent subunit B                                                                                                                | C1QB                | 223 | 5,476354219 |
| P09486                    | SPARC                                                                                                                                                | SPARC               | 342 | 5,456623826 |
| P19320                    | Vascular cell adhesion protein 1                                                                                                                     | VCAM1               | 434 | 5,414576576 |
| P00488                    | Coagulation factor XIII A chain                                                                                                                      | F13A1               | 140 | 5,339223375 |
| A0A0C4DH72                | Immunoglobulin kappa variable 1-6                                                                                                                    | IGKV1-6             | 53  | 5,276496174 |
| P13796                    | Plastin-2                                                                                                                                            | LCP1                | 401 | 5,226856952 |
| P06681                    | Complement C2;Complement C2b fragment;Complement C2a fragment                                                                                        | C2                  | 289 | 5,182896142 |
| Q13103                    | Secreted phosphoprotein 24                                                                                                                           | SPP2                | 594 | 5,090331615 |
| Q14624                    | Inter-alpha-trypsin inhibitor heavy chain H4;70 kDa inter-alpha-trypsin inhibitor heavy chain H4;35 kDa inter-alpha-trypsin inhibitor heavy chain H4 | ITIH4               | 613 | 5,062499162 |
| P19823                    | Inter-alpha-trypsin inhibitor heavy chain H2                                                                                                         | ITIH2               | 436 | 4,845485256 |
| P05543                    | Thyroxine-binding globulin                                                                                                                           | SERPINA7            | 282 | 4,754456855 |
| P01019                    | Angiotensinogen;Angiotensin-1;Angiotensin-2;Angiotensin-3;Angiotensin-4;Angiotensin 1-9;Angiotensin 1-7;Angiotensin 1-5;Angiotensin 1-4              | AGT                 | 159 | 4,729817666 |

|        |                                                                           |           |     |             |
|--------|---------------------------------------------------------------------------|-----------|-----|-------------|
| P04004 | Vitronectin;Vitronectin V65 subunit;Vitronectin V10 subunit;Somatomedin-B | VTN       | 245 | 4,602305247 |
| P01624 | Ig kappa chain V-III region POM                                           | IGKV3-15  | 175 | 4,577904542 |
| P02656 | Apolipoprotein C-III                                                      | APOC3     | 215 | 4,457365195 |
| P02652 | Apolipoprotein A-II;Proapolipoprotein A-II;Truncated apolipoprotein A-II  | APOA2     | 212 | 4,280061845 |
| P04114 | Apolipoprotein B-100;Apolipoprotein B-48                                  | APOB      | 250 | 4,260675258 |
| P02790 | Hemopexin                                                                 | HPX       | 240 | 4,18808978  |
| P22352 | Glutathione peroxidase 3                                                  | GPX3      | 446 | 4,080072782 |
| P39060 | Collagen alpha-1(XVIII) chain;Endostatin                                  | COL18A1   | 503 | 3,973038792 |
| P02654 | Apolipoprotein C-I;Truncated apolipoprotein C-I                           | APOC1     | 213 | 3,910669604 |
| P01834 | Ig kappa chain C region                                                   | IGKC      | 199 | 3,813767724 |
| P33908 | Mannosyl-oligosaccharide 1,2-alpha-mannosidase IA                         | MAN1A1    | 489 | 3,800173301 |
| P35542 | Serum amyloid A-4 protein                                                 | SAA4      | 493 | 3,624006683 |
| P04406 | Glyceraldehyde-3-phosphate dehydrogenase                                  | GAPDH     | 259 | 3,592176464 |
| P05154 | Plasma serine protease inhibitor                                          | SERPINA5  | 273 | 3,49112152  |
| P08253 | 72 kDa type IV collagenase;PEX                                            | MMP2      | 324 | 3,454069121 |
| P15151 | Poliovirus receptor                                                       | PVR       | 410 | 3,40733249  |
| P22105 | Tenascin-X                                                                | TNXB      | 445 | 3,25029076  |
| Q13822 | Ectonucleotide pyrophosphatase/phosphodiesterase family member 2          | ENPP2     | 606 | 3,226108683 |
| P02647 | Apolipoprotein A-I;Proapolipoprotein A-I;Truncated apolipoprotein A-I     | APOA1     | 210 | 3,132242057 |
| P01033 | Metalloproteinase inhibitor 1                                             | TIMP1     | 163 | 3,051476479 |
| P02766 | Transthyretin                                                             | TTR       | 233 | 2,943858711 |
| P06312 | Ig kappa chain V-IV region                                                | IGKV4-1   | 287 | 2,846413107 |
| P14543 | Nidogen-1                                                                 | NID1      | 404 | 2,613375946 |
| P00915 | Carbonic anhydrase 1                                                      | CA1       | 154 | 2,594549656 |
| P02745 | Complement C1q subcomponent subunit A                                     | C1QA      | 222 | 2,592587678 |
| Q14766 | Latent-transforming growth factor beta-binding protein 1                  | LTBP1     | 615 | 2,510159406 |
| P55058 | Phospholipid transfer protein                                             | PLTP      | 528 | 2,285980033 |
| P19827 | Inter-alpha-trypsin inhibitor heavy chain H1                              | ITIH1     | 437 | 2,241609444 |
| P04217 | Alpha-1B-glycoprotein                                                     | A1BG      | 255 | 2,158069858 |
| Q13790 | Apolipoprotein F                                                          | APOF      | 605 | 2,008189366 |
| Q6UWP8 | Suprabasin                                                                | SBSN      | 640 | 1,9723215   |
| Q7Z7M0 | Multiple epidermal growth factor-like domains protein 8                   | MEGF8     | 649 | 1,849044014 |
| Q9UK55 | Protein Z-dependent protease inhibitor                                    | SERPINA10 | 743 | 1,758411904 |

|            |                                                                                             |          |     |             |
|------------|---------------------------------------------------------------------------------------------|----------|-----|-------------|
| P04180     | Phosphatidylcholine-sterol acyltransferase                                                  | LCAT     | 252 | 1,730695395 |
| Q12805     | EGF-containing fibulin-like extracellular matrix protein 1                                  | EFEMP1   | 587 | 1,724635423 |
| P00740     | Coagulation factor IX;Coagulation factor IXa light chain;Coagulation factor IXa heavy chain | F9       | 148 | 1,71002366  |
| P68871     | Hemoglobin subunit beta;LVV-hemorphin-7;Spinorphin                                          | HBB      | 558 | 1,624860109 |
| Q6UY14     | ADAMTS-like protein 4                                                                       | ADAMTSL4 | 643 | 1,343220363 |
| P18428     | Lipopolysaccharide-binding protein                                                          | LBP      | 430 | 1,240522784 |
| P69905     | Hemoglobin subunit alpha                                                                    | HBA1     | 560 | 0,841222331 |
| A0A0C4DH38 | Immunoglobulin heavy variable 5-51                                                          | IGHV5-51 | 48  | 0,838427785 |
| P11717     | Cation-independent mannose-6-phosphate receptor                                             | IGF2R    | 387 | 0,264799369 |

---
